# Supplementary material
Source: HighWire-hosted journal article supplement (https://dmd.aspetjournals.org/content/suppl/2012/02/16/dmd.111.042994)
Supplement: Second_revision_Supplementary_material.pdf [file Second_revision_Supplementary_material.pdf]

Supplementary Material

Journal:

Drug Metabolism and Disposition

Title of Article:

Mechanistic pharmacokinetic modeling for the prediction of transporter-mediated disposition in human from sandwich culture human hepatocyte data

Author's names:

Hannah M Jones, Hugh A Barton, Yurong Lai, Yi-an Bi, Emi Kimoto, Sarah Kempshall, Sonya C Tate, Ayman El-Kattan, J Brian Houston, Aleksandra Galetin and Katherine S Fenner

**Figure S1:** Raw SCHH data for (A-B) pravastatin, (C-F) cerivastatin, (G) bosentan, (H-J) fluvastatin, (K-R) rosuvastatin, (S-U) valsartan and (V-X) repaglinide.

*Solid diamonds represent HBSS only, open squares represent Ca<sup>2+</sup>/Mg<sup>2+</sup> free, solid triangles represent HBSS + Rifamycin SV*

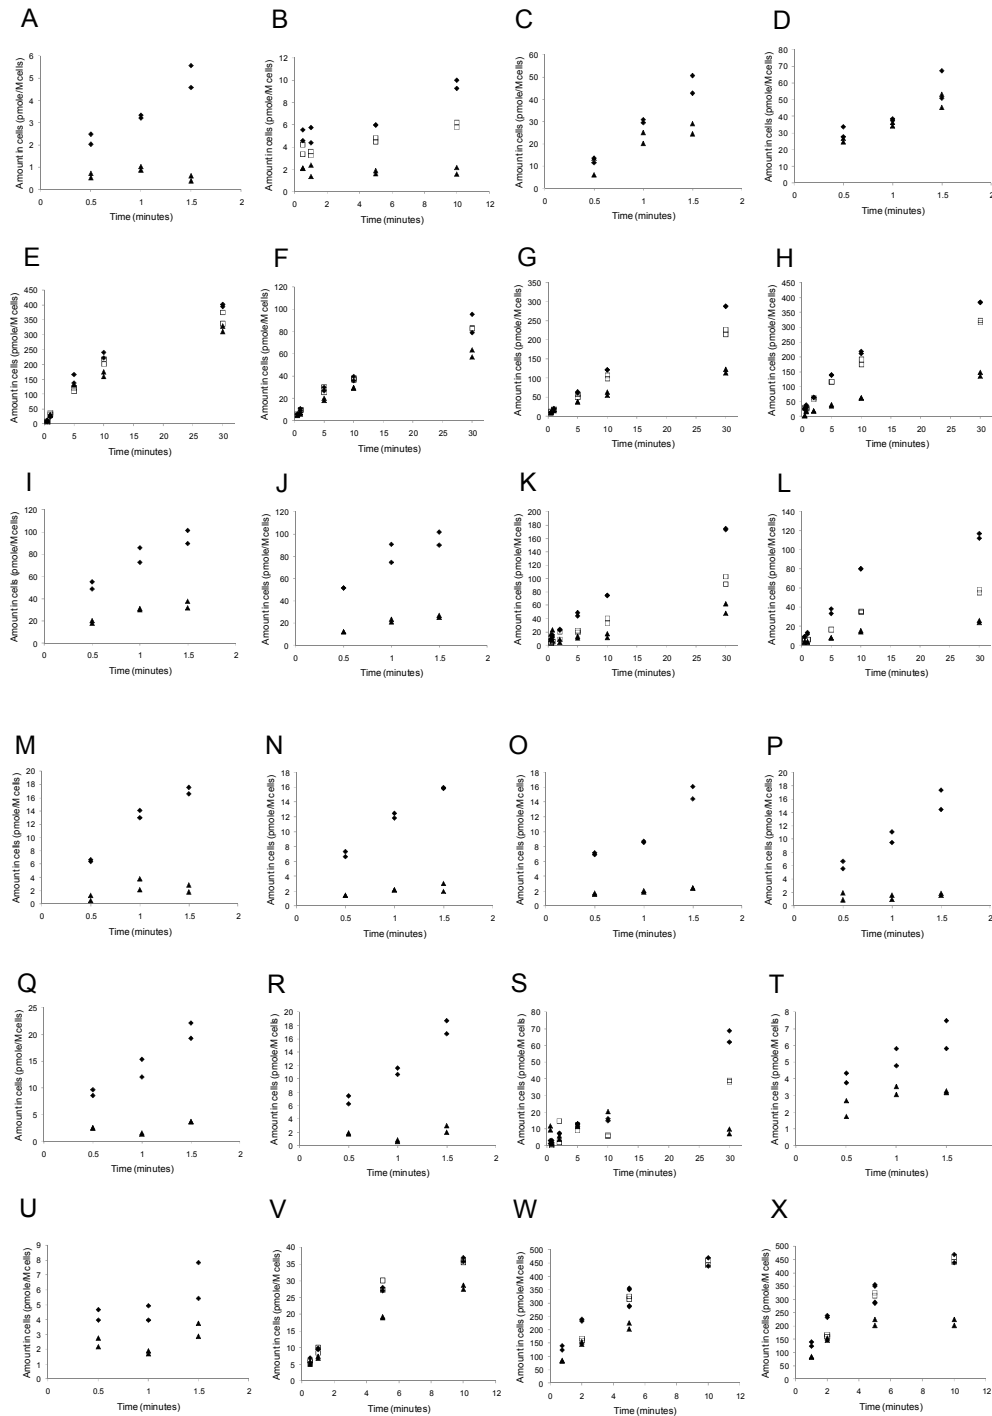

**Figure S2:** Fitted versus observed human plasma concentration time data for (A) pravastatin, (B) cerivastatin, (C) bosentan, (D) fluvastatin, (E) rosuvastatin, (F) valsartan, (G) repaglinide.

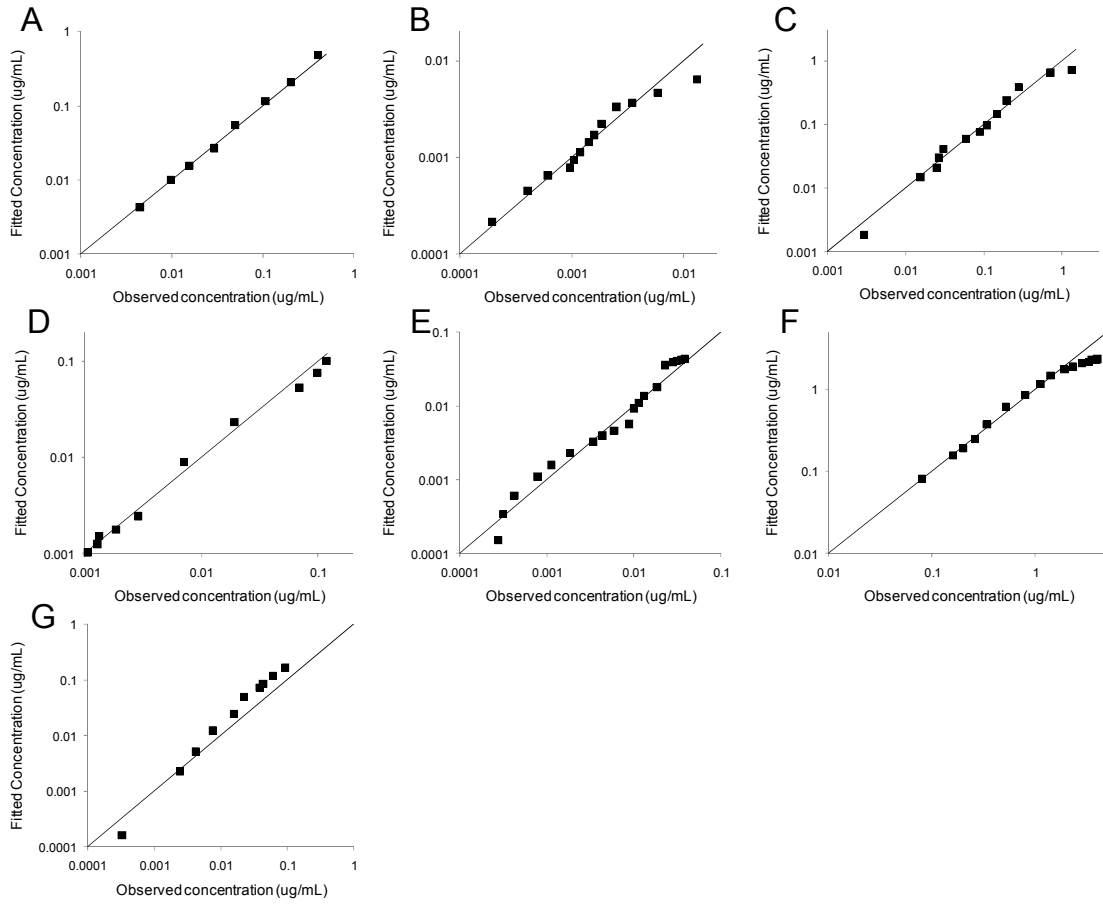

**Figure S3:** Contour plots for pairs of fitted parameters (A-C) pravastatin, (D-F) cerivastatin, (G-I) bosentan, (J-L) fluvastatin, (M-O) rosuvastatin, (P-R) valsartan and (S) repaglinide.

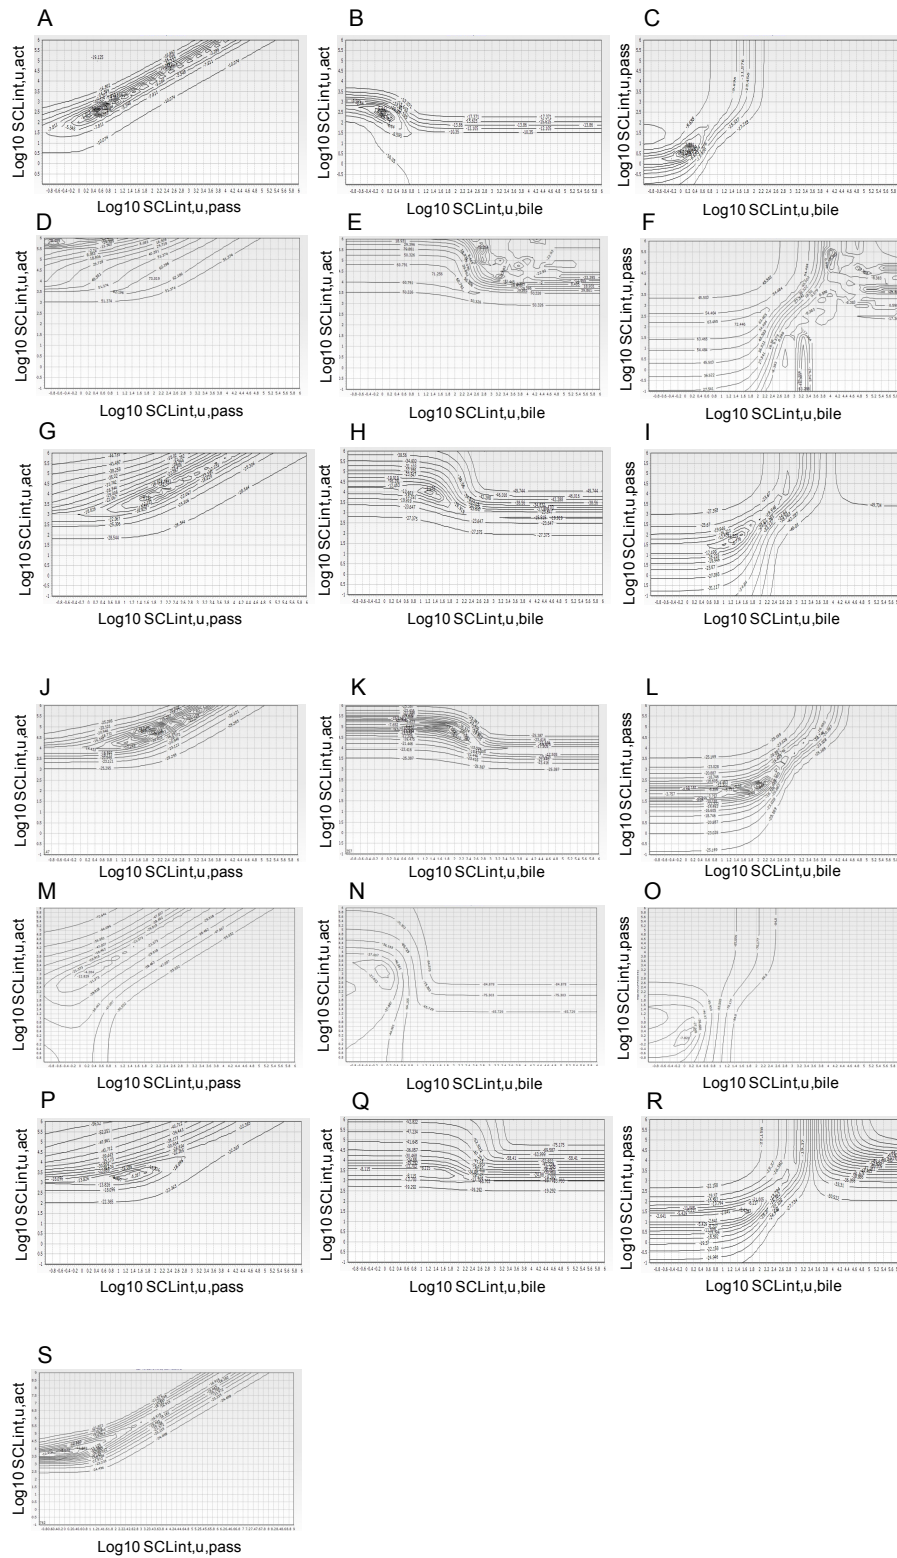

**Table S1** – Clinical pharmacokinetic properties and substrate specificity for the compounds studied

| Compound                  | CL,i.v. mL/min/kg | Vss,i.v. L/Kg | % renal CL | Substrate specificity          |
|---------------------------|-------------------|---------------|------------|--------------------------------|
| Pravastatin <sup>1</sup>  | 14                | 0.46          | 47         | OATP1B1, MRP2                  |
| Cerivastatin <sup>2</sup> | 2.9               | 0.33          | 0          | OATP1B1, CYP3A4, 2C8           |
| Bosentan <sup>3</sup>     | 2.3               | 0.67          | 0          | OATP1B1, 1B3, 2B1, CYP3A4, 2C9 |
| Fluvastatin <sup>4</sup>  | 8.7               | 0.16          | 0          | OATP1B1, 2B1, 1B3, CYP2C9      |
| Rosuvastatin <sup>5</sup> | 11                | 1.7           | 30         | OATP1B1, 1B3, 2B1, BCRP        |
| Valsartan <sup>6</sup>    | 0.49              | 0.23          | 29         | OATP1B1, 1B3                   |
| Repaglinide <sup>7</sup>  | 7.8               | 0.35          | 0          | OATP1B1, CYP3A4, 2C8           |

<sup>1</sup> Singhvi et al., 1990; <sup>2</sup> Muck et al., 1997; <sup>3</sup> Weber et al., 1996; <sup>4</sup> Lindahl et al., 1996; <sup>5</sup> Martin et al., 2003; <sup>6</sup> Flesch et al., 1997; <sup>7</sup> Hatorp et al., 1998

**Table S2** Quantification of OATP1B1, 1B3 and 2B1 in suspension hepatocytes and SCHH

|         | Suspension        | SCHH at day 5 | Change compared to<br>suspension |
|---------|-------------------|---------------|----------------------------------|
|         | (fmol/ug protein) |               | %                                |
| OATP1B1 | 3.42±0.11         | 5.28±0.22     | 154 <sup>1</sup>                 |
| OATP1B3 | 1.50±0.15         | 0.88±0.11     | 59 <sup>1</sup>                  |
| OATP2B1 | 1.84±0.15         | 1.23±0.12     | 67*                              |

<sup>1</sup> P<0.05, as compared to suspension.

**Supplementary References**

- Flesch G, Muller P, and Lloyd P (1997) Absolute bioavailability and pharmacokinetics of valsartan, an angiotensin II receptor antagonist, in man. *Eur J Clin Pharmacol* 52:115-120.
- Hatorp V, Oliver S, and Su CA (1998) Bioavailability of repaglinide, a novel antidiabetic agent, administered orally in tablet or solution form or intravenously in healthy male volunteers. *Int J Clin Pharmacol Ther* 36:636-641.
- Lindahl A, Sandstrom R, Ungell AL, Abrahamsson B, Knutson TW, Knutson L, and Lennernas H (1996) Jejunal permeability and hepatic extraction of fluvastatin in humans. *Clin Pharmacol Ther* 60:493-503.
- Martin PD, Warwick MJ, Dane AL, Brindley C, and Short T (2003) Absolute oral bioavailability of rosuvastatin in healthy white adult male volunteers. *Clin Ther* 25:2553-2563.
- Muck W, Ritter W, Ochmann K, Unger S, Ahr G, Wingender W, and Kuhlmann J (1997) Absolute and relative bioavailability of the HMG-CoA reductase inhibitor cerivastatin. *Int J Clin Pharmacol Ther* 35:255-260.
- Singhvi SM, Pan HY, Morrison RA, and Willard DA (1990) Disposition of pravastatin sodium, a tissue-selective HMG-CoA reductase inhibitor, in healthy subjects. *Br J Clin Pharmacol* 29:239-243.
- Weber C, Schmitt R, Birnboeck H, Hopfgartner G, van Marle SP, Peeters PA, Jonkman JH, and Jones CR (1996) Pharmacokinetics and pharmacodynamics of the endothelin-receptor antagonist bosentan in healthy human subjects. *Clin Pharmacol Ther* 60:124-137.
